# Supplementary material
Source: PubMed Central journal article supplement (PMC7581871)
Supplement: mmc1.pdf [file mmc1.pdf]

# Survey on Student's Learning Behaviour Amid COVID-19 Pandemic

You are invited to participate in a research study. This survey will take between 10 and 15 minutes to complete. Every question is entirely voluntary. The survey does not collect any personally identifiable information, and your responses will always remain strictly anonymous.

This survey is conducted in relation to identify the students' learning behaviour during this COVID-19 pandemic and the level of difficulties that they experienced. It will serve these purposes best if items are answered carefully and honestly as you reflect back on your learning experience through this pandemic period. All the information gathered will be used for the academic purpose only.

If you have any questions or comments, please do not hesitate to contact us via email at: [nurulhudaghazali@uitm.edu.my](mailto:nurulhudaghazali@uitm.edu.my)

The survey display is optimized for desktop browser with keyboard input. If you are on a mobile phone, you may need to rotate your display to respond to some questions.

\* Required

1. To start the survey, please select a response below : \*

*Mark only one oval.*

- I would like to participate in the survey AND I am 18 years or older
- I would NOT like to participate the survey AND/OR I am not 18 years or older  
*Skip to section 5 (Your cooperation and honesty for taking part in this survey are highly appreciated. Thank you.)*

Section A.

This section will gather your demographic information.

2. What is your current age? \*

*Mark only one oval.*

- Less than 18
- 18-21
- 22-25
- 26-29
- More than 29

3. What is your gender? \*

*Mark only one oval.*

- Male
- Female

4. Which campus are you currently pursuing your study? \*

*Mark only one oval.*

- Jasin
- Alor Gajah
- Bandaraya Melaka

5. Which faculty are you currently pursuing your study? \*

*Mark only one oval.*

- Faculty of Computer & Mathematical Sciences
- Faculty of Plantation & Agrotechnology
- Faculty of Communication & Media Studies
- Faculty of Art & Design
- Faculty of Accountancy
- Faculty of Business & Management
- Faculty of Hotel & Tourism Management

6. Which semester are you in? \*

*Mark only one oval.*

- 1st Semester
- 2nd Semester
- 3rd Semester
- 4th Semester
- 5th Semester
- 6th Semester
- 7th Semester
- 8th Semester
- 9th Semester
- 10th Semester
- None of the above

7. What level of education are you currently pursuing? \*

*Mark only one oval.*

- Diploma
- Undergraduate (Bachelor)
- Master
- PhD or Postdoctoral

8. Has your institution moved to virtual instruction due to the COVID-19 crisis? \*

*Mark only one oval.*

- Yes
- No

9. Where do you reside (live) currently? \*

*Mark only one oval.*

Rural area (Countryside)

Urban area (Town/City)

10. Occupation sector of the head of family : \*

*Mark only one oval.*

Government sector

Private sector

Self-employed

Unemployed

Other: \_\_\_\_\_

11. Occupation field of the head of family : \*

*Mark only one oval.*

Manager and Professional

Technical and Associate Professionals

Clerical Support Workers

Service and Sales Workers

Skilled Agricultural, Forestry, Livestock and Fisheries Workers

Craft and Related Trades Workers

Plant and Machine Operators and Assemblers

Other: \_\_\_\_\_

12. Total family income (gross ) per month : \*

*Mark only one oval.*

- < RM 4,000  
 RM 4,000 - RM 9,000  
 > RM 9,000

Section B.

13. During the last few months, have you experienced any of the following : \*

*Mark only one oval per row.*

|                                                                                     | Yes                   | No                    |
|-------------------------------------------------------------------------------------|-----------------------|-----------------------|
| Help or assistance from a stranger                                                  | <input type="radio"/> | <input type="radio"/> |
| Adverse discrimination from a stranger                                              | <input type="radio"/> | <input type="radio"/> |
| Difficulties due to changes in your living conditions, including hostel disclosures | <input type="radio"/> | <input type="radio"/> |
| Difficulties in travelling                                                          | <input type="radio"/> | <input type="radio"/> |

14. Relative to BEFORE COVID-19 crisis, how would you rank your CURRENT level of : \*

Mark only one oval per row.

|                                                                                    | N/A or I do not know  | Much worse than before | Worse than before     | Same as before        | Better than before    | Much better than before |
|------------------------------------------------------------------------------------|-----------------------|------------------------|-----------------------|-----------------------|-----------------------|-------------------------|
| Health care access                                                                 | <input type="radio"/> | <input type="radio"/>  | <input type="radio"/> | <input type="radio"/> | <input type="radio"/> | <input type="radio"/>   |
| Internet access                                                                    | <input type="radio"/> | <input type="radio"/>  | <input type="radio"/> | <input type="radio"/> | <input type="radio"/> | <input type="radio"/>   |
| Ability to pursue your studies, including your graduation and/or degree completion | <input type="radio"/> | <input type="radio"/>  | <input type="radio"/> | <input type="radio"/> | <input type="radio"/> | <input type="radio"/>   |
| Ability to socialize                                                               | <input type="radio"/> | <input type="radio"/>  | <input type="radio"/> | <input type="radio"/> | <input type="radio"/> | <input type="radio"/>   |
| Overall psychological well-being, including feelings of anxiety and/or depression  | <input type="radio"/> | <input type="radio"/>  | <input type="radio"/> | <input type="radio"/> | <input type="radio"/> | <input type="radio"/>   |

Section C.

\*Note: Self-learning can be define as: Learning done by oneself, without a teacher or instructor.

15. Learning habits during COVID-19: \*

Mark only one oval per row.

|                                                                                                 | Less than 2 hours     | Between 2 hours to 4 hours | Between 4 hours to 6 hours | Between 6 hours to 8 hours | More than 8 hours     |
|-------------------------------------------------------------------------------------------------|-----------------------|----------------------------|----------------------------|----------------------------|-----------------------|
| BEFORE COVID-19 crisis, how many hours do you spend per day for self-learning?                  | <input type="radio"/> | <input type="radio"/>      | <input type="radio"/>      | <input type="radio"/>      | <input type="radio"/> |
| DURING COVID-19 crisis, how many hours do you spend per day for self-learning?                  | <input type="radio"/> | <input type="radio"/>      | <input type="radio"/>      | <input type="radio"/>      | <input type="radio"/> |
| Regarding hours of learning DURING COVID-19 crisis, how many hours are online learning per day? | <input type="radio"/> | <input type="radio"/>      | <input type="radio"/>      | <input type="radio"/>      | <input type="radio"/> |

16. I think that self-learning during COVID-19 is necessary because : \*

Mark only one oval per row.

|                                                              | Strongly disagree     | Disagree              | Neither agree nor disagree | Agree                 | Strongly agree        |
|--------------------------------------------------------------|-----------------------|-----------------------|----------------------------|-----------------------|-----------------------|
| I can assure my learning progress.                           | <input type="radio"/> | <input type="radio"/> | <input type="radio"/>      | <input type="radio"/> | <input type="radio"/> |
| I can maintain my learning habit.                            | <input type="radio"/> | <input type="radio"/> | <input type="radio"/>      | <input type="radio"/> | <input type="radio"/> |
| My lecturers advise/inform me it is necessary and important. | <input type="radio"/> | <input type="radio"/> | <input type="radio"/>      | <input type="radio"/> | <input type="radio"/> |
| My parents advise/inform me it is necessary and important.   | <input type="radio"/> | <input type="radio"/> | <input type="radio"/>      | <input type="radio"/> | <input type="radio"/> |
| My siblings advise/inform me it is necessary and important.  | <input type="radio"/> | <input type="radio"/> | <input type="radio"/>      | <input type="radio"/> | <input type="radio"/> |
| My friends advise/inform me it is necessary and important.   | <input type="radio"/> | <input type="radio"/> | <input type="radio"/>      | <input type="radio"/> | <input type="radio"/> |



17. I consider my self-learning activities are effective because : \*

Mark only one oval per row.

|                                                               | Strongly disagree     | Disagree              | Neither agree nor disagree | Agree                 | Strongly agree        |
|---------------------------------------------------------------|-----------------------|-----------------------|----------------------------|-----------------------|-----------------------|
| I have motivation for self-learning.                          | <input type="radio"/> | <input type="radio"/> | <input type="radio"/>      | <input type="radio"/> | <input type="radio"/> |
| I have proper concentration skill.                            | <input type="radio"/> | <input type="radio"/> | <input type="radio"/>      | <input type="radio"/> | <input type="radio"/> |
| I have support from my family.                                | <input type="radio"/> | <input type="radio"/> | <input type="radio"/>      | <input type="radio"/> | <input type="radio"/> |
| I have an effective and conducive learning environment.       | <input type="radio"/> | <input type="radio"/> | <input type="radio"/>      | <input type="radio"/> | <input type="radio"/> |
| I can define my daily learning objectives.                    | <input type="radio"/> | <input type="radio"/> | <input type="radio"/>      | <input type="radio"/> | <input type="radio"/> |
| I have various learning resources.                            | <input type="radio"/> | <input type="radio"/> | <input type="radio"/>      | <input type="radio"/> | <input type="radio"/> |
| I communicate and collaborate with my friends about learning. | <input type="radio"/> | <input type="radio"/> | <input type="radio"/>      | <input type="radio"/> | <input type="radio"/> |

18. During COVID-19 crisis, I have learnt additional knowledge on : \*

Mark only one oval per row.

|                                      | Strongly disagree     | Disagree              | Neither agree nor disagree | Agree                 | Strongly agree        |
|--------------------------------------|-----------------------|-----------------------|----------------------------|-----------------------|-----------------------|
| Preventive health care.              | <input type="radio"/> | <input type="radio"/> | <input type="radio"/>      | <input type="radio"/> | <input type="radio"/> |
| Coronavirus.                         | <input type="radio"/> | <input type="radio"/> | <input type="radio"/>      | <input type="radio"/> | <input type="radio"/> |
| Sustainable environment development. | <input type="radio"/> | <input type="radio"/> | <input type="radio"/>      | <input type="radio"/> | <input type="radio"/> |
| E-learning tools and techniques.     | <input type="radio"/> | <input type="radio"/> | <input type="radio"/>      | <input type="radio"/> | <input type="radio"/> |

Your cooperation and honesty for taking part in this survey are highly appreciated.  
Thank you.

---

This content is neither created nor endorsed by Google.

Google Forms
